1     **An evolutionarily conserved coreceptor gene is essential for**  
2             **CLAVATA signaling in *Marchantia polymorpha***

3

4     **Go Takahashi<sup>1†</sup>, Shigeyuki Betsuyaku<sup>2†</sup>, Natsuki Okuzumi<sup>1</sup>, Tomohiro Kiyosue<sup>1</sup>,**  
5     **and Yuki Hirakawa<sup>1†\*</sup>**

6

7     <sup>1</sup> Graduate School of Science, Gakushuin University, Toshima-ku, Tokyo, Japan

8     <sup>2</sup> Faculty of Agriculture, Ryukoku University, Otsu, Shiga, Japan

9     <sup>†</sup>These authors have contributed equally to this work.

10

11     **\* Correspondence:**

12     Yuki Hirakawa

13     Email: [yuki.hirakawa@gakushuin.ac.jp](mailto:yuki.hirakawa@gakushuin.ac.jp)

14

15     **Running title:** CLAVATA coreceptor in *Marchantia*

16

17     **Keywords:** CLAVATA, coreceptor, *Marchantia*, meristem, LRR-RLK

18

1 **Abstract**

2 Growth and development of land plants are controlled by CLAVATA3/EMBRYO  
3 SURROUNDING REGION-related (CLE) family of peptide hormones. In contrast to the  
4 genetic diversity of CLE family in flowering plants, the liverwort *Marchantia*  
5 *polymorpha* possesses a minimal set of CLE, MpCLE1(TDIF homolog) and MpCLE2  
6 (CLV3 homolog). MpCLE1 and MpCLE2 peptides exert distinct function at the apical  
7 meristem of *M. polymorpha* gametophyte via specific receptors, MpTDIF RECEPTOR  
8 (MpTDR) and MpCLAVATA1 (MpCLV1), respectively, both belonging to the subclass  
9 XI of leucine-rich repeat receptor-like kinases (LRR-RLKs). Biochemical and genetic  
10 studies in *Arabidopsis* have shown that TDR/PXY family and CLV1/BAM family  
11 recognize the CLE peptide ligand in a heterodimeric complex with a member of subclass-  
12 II coreceptors. Here we show that three LRR-RLK genes of *M. polymorpha* are classified  
13 into subclass II, representing three distinct subgroups evolutionarily conserved in land  
14 plants. To address the involvement of subclass-II coreceptors in *M. polymorpha* CLE  
15 signaling, we performed molecular genetic analysis on one of them, MpCLAVATA3  
16 *INSENSITIVE RECEPTOR KINASE* (MpCIK). Two knockout alleles for MpCIK formed  
17 narrow apical meristems marked by *prom*MpYUC2:*GUS* marker, which were not expanded  
18 by MpCLE2 peptide treatment, phenocopying *Mpclv1*. Loss of sensitivity to MpCLE2  
19 peptide was also observed in gemma cup formation in both *Mpclv1* and *Mpcik*.  
20 Biochemical analysis using a *Nicotiana benthamiana* transient expression system  
21 revealed weak association between MpCIK and MpCLV1, as well as MpCIK and  
22 MpTDR. While MpCIK may also participate in MpCLE1 signaling, our data show that  
23 the conserved CLV3-CLV1-CIK module functions in *M. polymorpha*, controlling  
24 meristem activity for development and organ formation for asexual reproduction.

## 1 **Introduction**

2 CLAVATA3/EMBRYO SURROUNDING REGION-related (CLE) peptides are a family  
3 of peptide hormones in land plants, mediating cell-to-cell communication in the plant  
4 body (Murphy et al., 2012; Hirakawa and Sawa, 2019; Fletcher, 2020). CLE peptides are  
5 genetically encoded as a precursor protein possessing a conserved CLE domain(s) at or  
6 near the C-terminus. Biosynthesis of CLE peptide hormone from the CLE domain  
7 involves post-translational events including proteolytic cleavage, post-translation  
8 modifications and secretion to the apoplast (Ito et al., 2006; Kondo et al., 2006; Ohyama  
9 et al., 2009; Tamaki et al., 2013; Matsubayashi, 2014). In flowering plants, a large number  
10 of *CLE* genes are encoded in the genome, which have been extensively studied for the  
11 past two decades (Cock and McCormick 2001; Oelkers et al., 2008; Jun et al., 2010;  
12 Fletcher, 2020). The function of CLE genes cover a wide range of physiological processes  
13 including stem cell homeostasis in meristems, vascular cell differentiation, stomata  
14 differentiation and responses to various environmental cues (Fletcher et al., 1999; Suzaki  
15 et al., 2008; Okamoto et al., 2009; Stahl et al., 2009; Mortier et al., 2010; Etchells and  
16 Turner 2010; Hirakawa et al. 2010; Kondo et al., 2011; Fiume and Fletcher, 2012;  
17 Depuydt et al., 2013; Endo et al., 2013; Araya et al., 2014; Czyzewicz et al., 2015;  
18 Gutierrez-Alanis et al. 2017; Rodríguez-Leal et al., 2017; Qian et al., 2018; Takahashi et  
19 al., 2018; Ma et al., 2020). In bryophytes, which diverged early in the land plant lineage  
20 with respect to flowering plants (Puttick et al., 2018; Morris et al., 2018), relatively low  
21 number of *CLE* genes are encoded in the genome, providing simplified models to study  
22 the function of *CLE* genes (Bowman et al., 2017; Whitewoods et al. 2018). The minimal  
23 set of *CLE* genes, Mp*CLE1* (Mp6g07050) and Mp*CLE2* (Mp5g18050), are encoded in  
24 the genome of the liverwort *Marchantia polymorpha* (Bowman et al., 2017; Hirakawa et

1 al., 2019; Montgomery et al., 2020; Figure 1A). MpCLE1 and MpCLE2 are the orthologs  
2 of TDIF (tracheary element differentiation inhibitor factor) and CLV3 (CLAVATA3) of  
3 *Arabidopsis thaliana*, respectively, representing the two distinct subgroups of CLE  
4 peptide family. In *Arabidopsis*, specific bioactivities of TDIF and CLV3 are attributed to  
5 the difference in a few amino acids between them, which are mediated by two distinct  
6 groups of receptors, TDIF RECEPTOR/PHLOEM INTERCALATED WITH XYLEM  
7 (TDR/PXY) and CLAVATA1/BARELY ANY MERISTEMs (CLV1/BAMs), respectively  
8 (Fletcher et al., 1999; DeYoung et al., 2006; Fisher and Turner, 2007; Ogawa et al., 2008;  
9 Hirakawa et al., 2008; Rodriguez-Villalon et al., 2014; Shimizu et al., 2015; Shinohara  
10 and Matsubayashi, 2015; Hirakawa et al., 2017; Crook et al., 2020). Since the ligand-  
11 receptor pairs are conserved among flowering plants and bryophytes and no CLE  
12 homologs were found in sister streptophyte algae, the specific CLE peptide-receptor pairs  
13 may have originated in the common ancestor of land plants (Whitewoods et al., 2018;  
14 Hirakawa et al., 2019; Hirakawa et al., 2020). In *M. polymorpha*, CLE genes regulate the  
15 activity of the apical meristem located at the apical notch of the thalloid gametophyte  
16 body. MpCLE1-MpTDR signaling acts as a negative regulator of cell proliferation at the  
17 apical notch, while MpCLE2-MpCLV1 signaling functions as a positive regulator of stem  
18 cell activity in the apical notch (Hirakawa et al., 2019; Hirakawa et al., 2020).

19 Both TDR/PXY and CLV1/BAM belong to the subclass XI of leucine-rich repeat  
20 receptor-like kinase (LRR-RLK) family. In addition to CLE peptides, a number of peptide  
21 ligands have been shown to bind to specific members of subclass-XI receptors, which  
22 possess a long extracellular domain (ECD) composed of more than 20 LRRs (Shiu and  
23 Bleecker, 2001; Yamaguchi et al., 2006; Tabata et al., 2014; Ou et al., 2016; Shinohara et  
24 al., 2016; Song et al., 2016; Doblás et al., 2017; Nakayama et al., 2017; Doll et al., 2020).

1 Accumulating evidence indicates that subclass-II receptors, such as SOMATIC  
2 EMBRYOGENESIS RECEPTOR KINASE/BRASSINOSTEROID INSENSITIVE1-  
3 ASSOCIATED KINASE1 (SERK/BAK1) family, participate in the peptide hormone  
4 perception by forming a heterodimeric complex with subclass-XI receptors (Hohmann et  
5 al., 2017; Gou and Li, 2020). Structural studies have revealed that SERK coreceptors have  
6 a short ECD containing five LRRs. The ECD of subclass-II receptors do not interact  
7 strongly or at all to the peptide ligand by themselves and rather recognize the ligand-  
8 receptor complex (Santiago et al., 2013; Sun et al., 2013; Wang et al., 2015; Santiago et  
9 al., 2016; Okuda et al., 2020). In line with this scheme, PXY/TDR and SERK2 are  
10 reported to form a heterodimeric complex for TDIF recognition, and multiple knockout  
11 mutants for Arabidopsis *SERK* genes show reduced TDIF sensitivity in vascular  
12 development (Morita et al., 2016; Zhang et al., 2016a; Zhang et al., 2016b).

13 In contrast to TDIF, involvement of SERK family has not been observed in CLV3-  
14 type CLEs. Instead, another group of subclass-II receptors, CLV3 INSENSITIVE  
15 RECEPTOR KINASEs (CIKs), have been implicated in CLV3 peptide perception. CIK  
16 proteins can form protein complexes with CLV1/BAM receptors (Hu et al., 2018; Cui et  
17 al., 2018). Quadruple mutants for Arabidopsis *CIK1-4* genes develop enlarged shoot  
18 apical meristems, which is similar to those of *clv* mutants. The growth from the enlarged  
19 meristems is not arrested by treatment with CLV3 peptide, a negative regulator of stem  
20 cells in Arabidopsis (Hu et al., 2018). Furthermore, full activity of Arabidopsis  
21 CLE26/CLE45 peptides in root phloem cell differentiation requires *CLE-RESISTANT*  
22 *RECEPTOR KINASE (CLERK)/CIK2* although biochemical interaction is not detected  
23 between the ECDs of CLERK and the subclass-XI receptor BAM3 (Anne et al., 2018).

1 In this study, we searched for the homologs of *CIK* genes in *M. polymorpha* and analyzed  
2 their involvement in CLE peptide signaling by molecular genetic approach.

3

## 4 **Results**

### 5 **A single *CIK* ortholog in *M. polymorpha***

6 In the *M. polymorpha* genome, three LRR-RLK genes (Mp7g09160/Mapoly0068s0069,  
7 Mp7g14210/Mapoly0009s0106, Mp7g15980/Mapoly0560s0001) have been classified  
8 into subclass II (Sasaki et al., 2007; Bowman et al., 2017; Montgomery et al., 2020).

9 To better understand the evolutionary relationships, we performed phylogenetic analysis  
10 of the subclass-II genes from land plants (*Arabidopsis thaliana*, *Amborella trichopoda*,  
11 *Picea abies*, *Selaginella moellendorffii*, *Physcomitrium (Physcomitrella) patens*,  
12 *Sphagnum fallax*, *Marchantia polymorpha*) and charophycean algae (*Spirogyra pratensis*,  
13 *Coleochaete orbicularis*) based on the amino acid sequence of the kinase domain using a  
14 Bayesian method (Figure 1B). The tree inferred three subgroups diverged in the land plant  
15 lineage, each of which contains a single *M. polymorpha* gene. Mp7g14210, designated as  
16 Mp*CIK*, was grouped into a single subgroup with all *CIK* genes from *Arabidopsis*.  
17 Likewise, Mp7g09160/Mp*SERK* was grouped into the *SERK* subgroup with all  
18 *Arabidopsis SERK* genes. Thus, *M. polymorpha* genome may lack redundancy in CLE  
19 ligand/receptor/coreceptor orthologs (Figure 1A).

20

### 21 **CRISPR-Cas9 editing of Mp*CIK* does not affect overall growth of gametophyte**

22 To analyze the physiological function of the *CIK* coreceptor gene in *M. polymorpha*, we  
23 generated loss-of-function alleles for Mp*CIK* using CRISPR-Cas9 editing (Sugano et al.,  
24 2018). Sanger sequencing revealed that two independent transgenic lines, Mp*cik-1<sup>ge</sup>* and

1 *Mpck-2<sup>ge</sup>*, possess different mutations at the CRISPR/Cas9 target site, both predicted to  
 2 result in gene knockout due to premature termination of translation (Figure 1C). We could  
 3 not find significant differences in the overall morphology of thalli in 10-day-old *Mpck-1<sup>ge</sup>*  
 4 and *Mpck-2<sup>ge</sup>* plants grown from gemmae, compared to any of wild-type (Tak-1),  
 5 *Mpck-2<sup>ge</sup>* and *Mpck-1-3<sup>ge</sup>* genotypes (Figure 1D).

7 **Figure. 1 Analysis of LRR-RLK subclass II in *Marchantia polymorpha***

8 (A) The number of CLE-receptor  
 9 homologs. (B) A phylogenetic tree  
 10 of subclass-II LRR-RLKs,  
 11 generated with a Bayesian method  
 12 based on the conserved kinase  
 13 domain. The posterior  
 14 probabilities of trees are shown at  
 15 the nodes. Coleochaete sequence  
 16 was used as an outgroup. Land  
 17 plant sequences form a  
 18 monophyletic clade, which can be  
 19 divided into three subgroups as  
 20 indicated on the right. Inset shows  
 21 the list of species with their  
 22 phylogenetic relationships. (C)  
 23 Gene/protein structures and  
 24 genome editing alleles of MpCIK.  
 25 (top) Protein structure of MpCIK.  
 26 (middle) Structure of  
 27 MpCIK/Mp7g14210 locus with  
 28 the position of a designed guide  
 29 RNA (gRNA). (bottom) Genotyping of genome editing alleles. Target guide sequence is  
 30 in bold and PAM sequence is in blue. Deleted bases are indicated with hyphens in magenta.  
 31 Exon and intron are indicated in capital and small letters, respectively. N-terminal region  
 32 of WT and mutant proteins deduced from the genomic DNA sequences are indicated  
 33 below. Asterisks indicate translational termination. (D) Overall morphology of 10-day-  
 34 old plants grown from gemmae. Scale bars represent 0.5 mm.

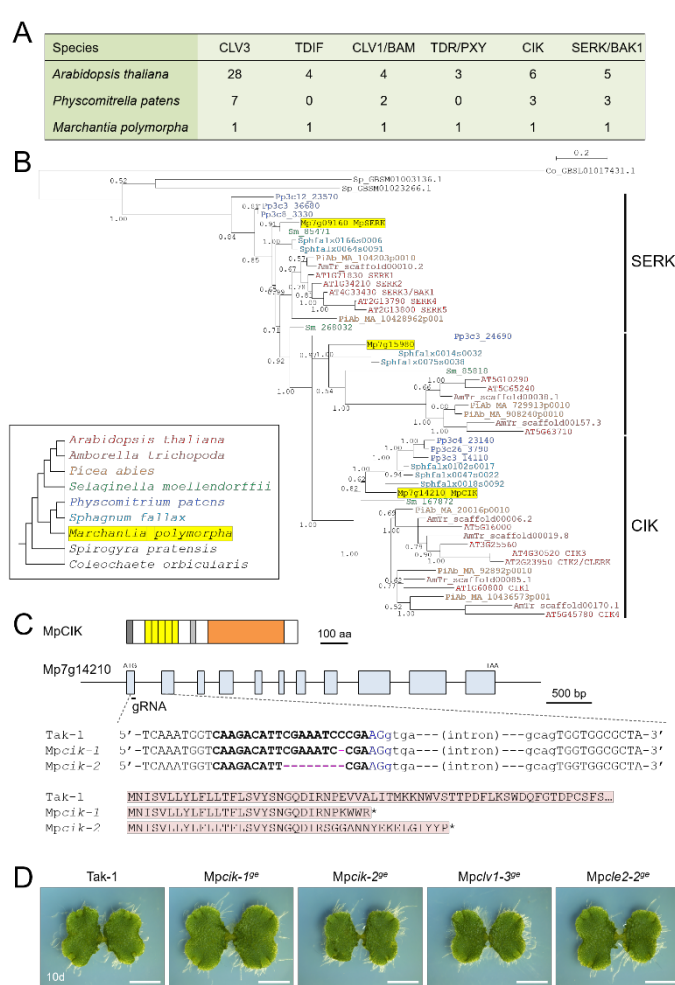



## Figure 2 Phenotypes of MpCIK knockout alleles in the apical notch

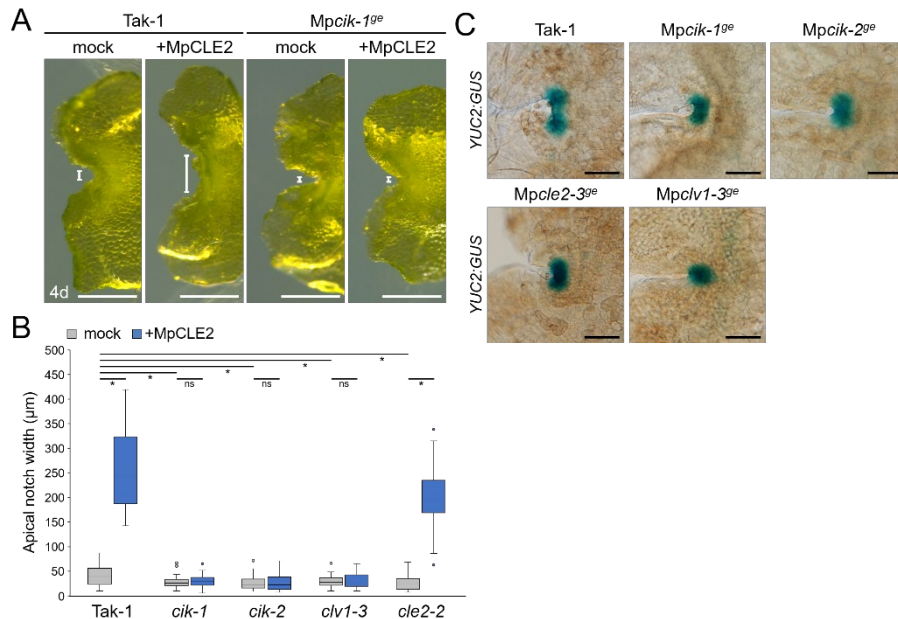

(A) Morphology of 4-day-old gemmalings grown with or without MpCLE2 peptide as indicated above. Width of apical notch is indicated by white lines. (B) Quantification of apical notch width. Asterisks indicate a significant difference in a two-tailed Welch's *t* test,  $p < 0.05$ ; ns, not significant;  $n = 30$ . (C) *pro*MpYUC2:GUS marker in 4-day-old gemmalings. Genetic background is indicated above each panel. Scale bars represent 500  $\mu\text{m}$  in (A) and 100  $\mu\text{m}$  in (C).

### MpCIK is necessary for MpCLE2 signaling to control apical notch expansion

To analyze the involvement of MpCIK in MpCLE2 peptide signaling, we examined the apical notch morphology in 4-day-old gemmalings grown on liquid M51C medium supplemented with or without 3  $\mu\text{M}$  MpCLE2 peptide. In wild-type gemmalings, apical notches were expanded by treatment with MpCLE2 peptide, as reported previously (Figures 2A and 2B; Hirakawa et al., 2020). By contrast, apical notches in both *Mpcik-1* and *Mpcik-2* were insensitive to MpCLE2 peptide, which is similar to those in *Mpclv1-3* (Figures 2A and 2B). Importantly, apical notches of the *Mpcik* and *Mpclv1* alleles were narrower than those of wild type in the growth without MpCLE2 peptide, indicating that MpCIK is involved in intrinsic MpCLE2-MpCLV1 signaling. Consistently, *Mpcle2-2<sup>9e</sup>*



1 developed narrow apical notches but it was sensitive to the treatment with the MpCLE2  
2 peptide as reported previously (Figure 2B; Hirakawa et al., 2020).  
3 *pro*MpYUC2(*YUCCA2*):*GUS* is a marker for the tip of apical notch, and *pro*MpYUC2:*GUS*-  
4 positive (MpYUC2<sup>+</sup>) region is affected by MpCLE2-MpCLV1 signaling (Eklund et al.,  
5 2015; Hirakawa et al., 2020). Compared to wild-type (Tak-1) background, MpYUC2<sup>+</sup>  
6 region was reduced in *Mpcik* backgrounds, phenocopying *Mpclv1-3* (Figure 2C). These  
7 data support that MpCIK is an essential component of the MpCLE2 peptide perception.

8

### 9 **Figure. 3 MpCIK knockout suppresses gain-of-function phenotypes of MpCLE2**

10 **(A) Overall morphology**

11 of 16-day-old plants  
12 grown from gemmae.

13 Genotypes are indicated  
14 above the panels. The  
15 upper middle panel  
16 shows the magnification  
17 of Tak-1 image in which  
18 arrows indicate gemma

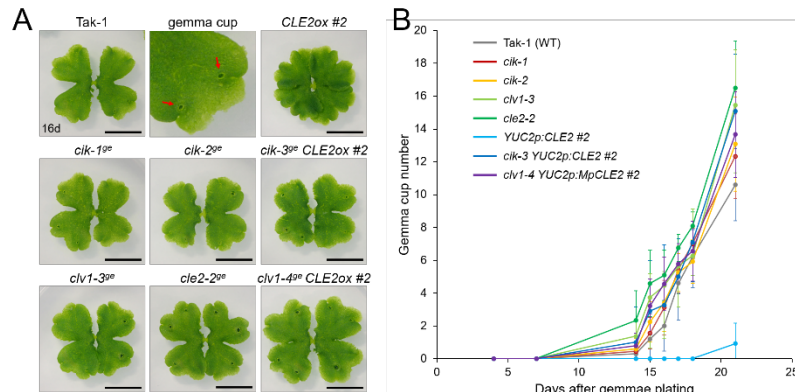

19 cups. Note that *pro*MpYUC2:MpCLE2 (*CLE2ox*) exhibits multichotomy and produces no  
20 gemmae cups at this age. Scale bars represent 1 cm. **(B)** Number of gemmae cups (mean  
21 and SD; n= 9-12). *CLE2ox* showed a significant delay of gemmae cup formation. Data  
22 are obtained at 4, 7, 14, 15, 16, 17, 18, 21 days after gemmae plating. This experiment  
23 was repeated twice with similar results.

24

### 25 **MpCLE2 signaling affects thallus branching and gemma cup formation via** 26 **MpCLV1 and MpCIK**

27 To further address the involvement of MpCIK in MpCLE2 signaling, we used  
28 *pro*MpYUC2:MpCLE2, a gain of function allele of MpCLE2, which stably develops  
29 supernumerary branching from the expanded apical meristems (Hirakawa et al., 2020).

30 We generated *Mpcik* and *Mpclv1* knockout alleles in *pro*MpYUC2:MpCLE2-2 background

1 by CRISPR/Cas9-mediated genome editing (Figure S1). Both *Mpcik-3<sup>ge</sup>* and *Mpclv1-4<sup>ge</sup>*  
2 suppressed the supernumerary branching phenotype in 16-day-old plants (Figure 3A),  
3 which is consistent with the results in peptide treatment assay (Figure 2B). Furthermore,  
4 the number of gemma cup formed on thalli was reduced in *proMpYUC2:MpCLE2* and it  
5 was suppressed in both *Mpcik-3<sup>ge</sup>* and *Mpclv1-4<sup>ge</sup>* (Figure 3A). Time-course analysis  
6 showed that the gemma cup formation was significantly reduced and delayed in  
7 *proMpYUC2:MpCLE2* plants compared to wild type (Figure 3B). Meanwhile, all *Mpcik*  
8 and *Mpclv1* alleles showed minor increase in gemma cup formation compared to wild  
9 type (Figure 3B).

10

### 11 **Biochemical interaction of MpCIK and MpCLV1 proteins**

12 Since the genetic analysis suggests that MpCIK may function as a coreceptor for  
13 MpCLV1 for the perception of MpCLE2 peptide, we examined the biochemical  
14 interaction between MpCIK and MpCLV1 proteins expressed in a *Nicotiana benthamiana*  
15 transient expression system, which has been utilized to analyze the interaction of CLV  
16 and CIK receptors of Arabidopsis (Kinoshita et al., 2010; Betsuyaku et al. 2011; Hu et al.  
17 2018). MpCIK, MpCLV1 and MpTDR were expressed under the control of 35S promoter  
18 in *N. benthamiana* as proteins C-terminally fused to 3× HAS-single StrepII or 3× FLAG  
19 (MpCIK-3HS, MpCLV1-3FLAG, MpTDR-3FLAG), respectively (Figure 4A). MpTDR,  
20 a receptor for MpCLE1, was also included in this interaction assay (Hirakawa et al. 2019).  
21 In co-immunoprecipitation experiments using an anti-HA affinity matrix, MpCLV1-  
22 3FLAG was detected not strongly but reproducibly in the immunoprecipitates containing  
23 MpCIK-3HS, suggesting a weak or transient interaction between MpCIK-3HS and  
24 MpCLV1-3FLAG (Figure 4B). Similarly, MpTDR-3FLAG was also shown to associate

1 weakly with MpCIK-3HS (Figure 4B). Thus, MpCLV1 and MpTDR are capable of  
 2 interacting with MpCIK.

3

4 **Figure 4. MpCIK weakly associates with MpCLV1 and MpTDR in *N. benthamiana***

5 (A) Schematic illustration of expressed receptors.

6 (B) Co-immunoprecipitation experiment using anti-  
 7 HA affinity matrix. The indicated combinations of  
 8 MpCIK-3HS, MpCLV1-3FLAG and MpTDR-  
 9 3FLAG constructs, together with p19 silencing  
 10 suppressor, were transiently expressed in *N.*  
 11 *benthamiana*. Total proteins were extracted and  
 12 immunoprecipitated with anti-HA affinity matrix.  
 13 Immunoblot analyses were performed using anti-  
 14 HA or anti-FLAG antibody. In the presence of  
 15 MpCIK-3HS, MpCLV1-3FLAG and MpTDR-  
 16 3FLAG were co-precipitated with anti-HA affinity  
 17 matrix. This experiment was repeated twice with  
 18 similar results.

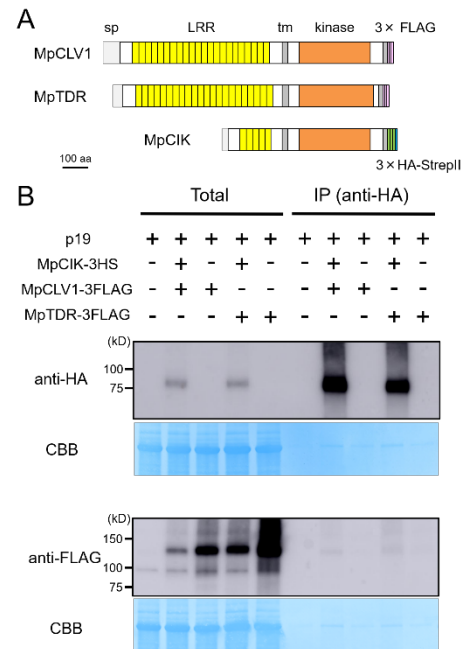

19

20 **MpCIK is sensitive to MpCLE1 and TDIF**

21 Our biochemical data suggests that MpCIK could also function as a coreceptor for  
 22 MpTDR upon the perception of MpCLE1, a TDIF-type CLE peptide. Previously, we  
 23 showed that synthetic TDIF-type peptides cause slight reduction of overall growth and  
 24 twisted lobes in *M. polymorpha* thalli (Hirakawa et al., 2019). In order to address the  
 25 possible involvement of MpCIK in MpCLE1 signaling, we first examined the effects of  
 26 TDIF, the strongest analog among known TDIF-type CLE peptides including MpCLE1  
 27 peptide. In 14-day-old plants grown from gemmae on growth medium supplemented with  
 28 3 μM TDIF, both Tak-1 and *MpCIK-1* showed slight reduction of overall growth and twist  
 29 in the thallus lobes (Figure 5A), indicating that MpCIK is not necessary for the perception  
 30 of TDIF. We further analyzed the effects of MpCLE1 overexpression using

1 *proMpYUC2:MpCLE1* transformants. In the wild-type (Tak-1) background,  
 2 *proMpYUC2:MpCLE1* resulted in small, twisted thalli in 14-day-old plants. This  
 3 phenotype was not observed in *proMpYUC2:MpCLE1<sup>1-417</sup>*, a truncated version of  
 4 MpCLE1 lacking an essential asparagine residue in the CLE peptide motif (Figure 5B;  
 5 Hirakawa et al., 2019). In the *Mpcik-1<sup>ge</sup>* background, *proMpYUC2:MpCLE1* also resulted  
 6 in small twisted thalli although the effects on growth was mild compared to the Tak-1  
 7 background, as judged from the ground cover area in 14-day-old plants (Figures 5B and  
 8 5C). These data suggests that MpCIK could be partially involved in MpCLE1 perception.

9

10 **Figure 5. Growth of *Mpcik* thalli is sensitive to MpCLE1/TDIF activity.**

11 **(A)** Overall morphology  
 12 of 14-day-old plants  
 13 grown from gemmae on  
 14 medium supplemented  
 15 with or without TDIF  
 16 peptide as indicated  
 17 above. Side view panels  
 18 show the images taken  
 19 from the right in the top  
 20 view panels as indicated  
 21 by red arrowheads. Note  
 22 that thalli are twisted in  
 23 plants treated with TDIF,  
 24 resulting in the uplift of  
 25 the thalli from the medium  
 26 as indicated by arrows.

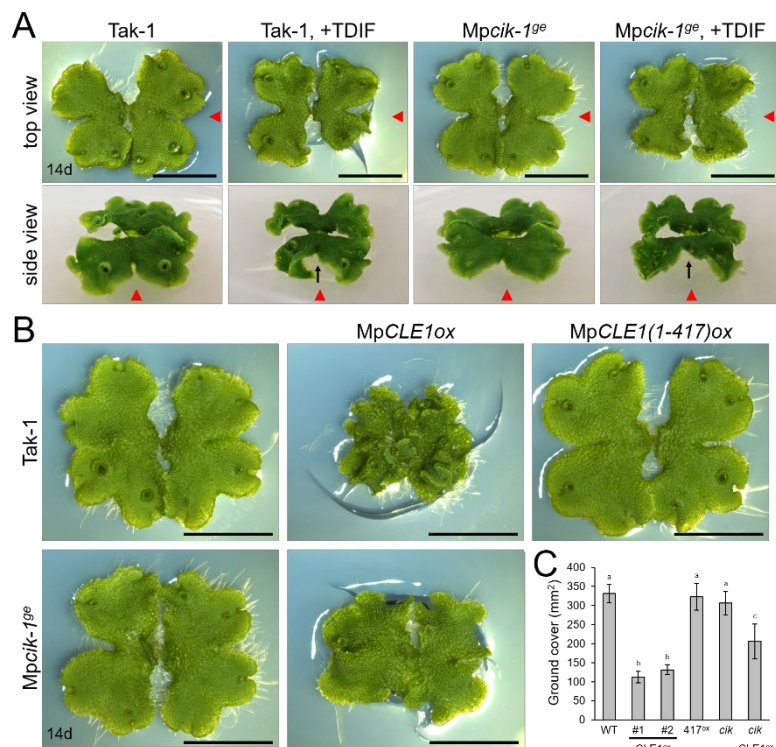

27 **(B)** Overall morphology of 14-day-old plants grown from gemmae. *MpCLE1ox* indicates  
 28 overexpression under *MpYUC2* promoter (*proMpYUC2:MpCLE1*) in Tak-1 and *Mpcik-*  
 29 *1<sup>ge</sup>* background. *MpCLE1(1-417)ox*, indicates a truncate version of *MpCLE1*. **(C)** Ground  
 30 cover in 14-day-old plants (mean and SD; n= 11-14). Means sharing the superscripts are  
 31 not significantly different from each other in Tukey's HSD test, p < 0.05. Scale bars  
 32 represent 1 cm in (A) and (B).

## 1 Discussion

2 In this study, we performed functional analysis of MpCIK, the sole *M. polymorpha*  
3 ortholog of Arabidopsis *CIK* genes, and showed that MpCIK is essential for MpCLE2  
4 peptide signaling to regulate the apical meristem activity in gametophyte. Biochemical  
5 analysis in *N. benthamiana* supports the idea that the MpCLV1-MpCIK is a receptor-  
6 coreceptor pair for MpCLE2 peptide perception. Since the same ligand-receptor-  
7 coreceptor relationship of CLV3-CLV1-CIK is consistently observed for multiple  
8 paralogs in Arabidopsis (Hu et al., 2018; Cui et al., 2018; Anne et al., 2018), this system  
9 is likely an evolutionarily conserved mechanism for the perception of CLV3-type CLE  
10 peptide in land plants. In addition, we suggested partial involvement of MpCIK in  
11 signaling of TDIF-type CLE peptide, MpCLE1, although MpCIK is not necessary for  
12 MpCLE1 signaling. Studies in Arabidopsis have suggested that subclass-II receptors in  
13 the SERK subgroup function as coreceptors for TDIF-PXY/TDR signaling (Zhang et al.,  
14 2016b). Further studies on MpSERK would clarify the contribution of different  
15 coreceptors. The phylogenetic analysis inferred the divergence of CIK and SERK  
16 subgroups in the common ancestor of land plants, which coincides with the appearance  
17 of subclass-XI genes. Recent studies have also shown that SERK-interacting receptors  
18 from subclass X, such as BRI1/BRL and EMS1, are also encoded in bryophytes (Ferreira-  
19 Guerra et al., 2020; Furumizu and Sawa 2021). Interestingly, the two sequences from  
20 *Spirogyra pratensis* (Figure 1B) showed high similarity to the subclass-II genes from land  
21 plants. Studies on Zygnematales algae would provide a clue to understand the evolution  
22 of these receptors.

23 Gemma cups are specialized structures for vegetative propagation, found in certain  
24 species of Marchantiopsida (Yasui et al., 2019; Kato et al., 2020). Gemma cup formation

1 initiates at the cells in the dorsal epidermis close to the apical meristem (Suzuki et al.,  
2 2020). We show that gain-of-function of MpCLE2 results in the delay of gemma cup  
3 formation although it is still unclear if the phenotypes in gemma cup formation can be  
4 uncoupled from the defects in the apical meristem. More detailed experiments will clarify  
5 the role for CLE in gemma cup formation. It is known that hormonal and environmental  
6 cues affect the formation of gemma cup (Flores-Sandoval et al., 2015; Aki et al., 2019;  
7 Li et al., 2020; Rico-Reséndiz et al., 2020). A possible role for MpCLE2 peptide signaling  
8 would be to mediate certain environmental cues to control the timing of gemma cup  
9 formation and thus clonal propagation, cooperatively with other hormonal inputs. In  
10 addition, involvement of CIK subgroup members into antiviral responses has been  
11 suggested in Arabidopsis (Fontes et al., 2004). Further studies of Mpcik knockout plants  
12 under various environmental conditions would provide a new insight into signals that  
13 allowed plants to survive on land.

14 Our biochemical data reveals that MpCIK is capable of associating with MpCLV1  
15 or MpTDR in an ectopic and transient expression system of *N. benthamiana*. Furthermore,  
16 weak associations observed for MpCIK-MpCLV1 as well as MpCIK-MpTDR indicates  
17 possible requirement of other components in MpCIK-containing complex formation. For  
18 instance, in a ligand-induced dimerization model, receptor-coreceptor interaction can be  
19 induced by the perception of ligand at their ectodomains, which in turn allows for their  
20 kinase domains to transphosphorylate and activate signaling (Jaillais et al., 2011; Hohmann  
21 et al., 2018; Perraki et al., 2018). Thus, ligand and/or other membrane receptors could be  
22 required for strong MpCIK-MpCLV1/MpTDR association. With its genetic simplicity in  
23 CLE signaling, *M. polymorpha* will be a nice experimental system to address this point  
24 in future studies.



## 1 **Materials and Methods**

### 2 **Phylogenetic analysis**

3 Gene sequences of land plants were retrieved from Phytozome v12.1 database  
4 (<https://phytozome.jgi.doe.gov/pz/portal.html>) except for those of *Arabidopsis thaliana*  
5 (<https://www.arabidopsis.org/>), *Picea abies* (<http://congenie.org/>) and *Marchantia*  
6 *polymorpha* (<https://marchantia.info/>). Sequences of charophycean algae were reported  
7 in Bowman et al. 2017, obtained from transcriptome databases for *Spirogyra pratensis*  
8 (<http://www.ncbi.nlm.nih.gov/Traces/wgs/wgsviewer.cgi?val=GBSM01&search=GBS>  
9 [M01000000&display=scaffolds](http://www.ncbi.nlm.nih.gov/Traces/wgs/wgsviewer.cgi?val=GBSM01000000&display=scaffolds)) and *Coleochaete orbicularis*  
10 (<http://www.ncbi.nlm.nih.gov/Traces/wgs/wgsviewer.cgi?val=GBSL01&search=GBSL>  
11 [01000000&display=scaffolds](http://www.ncbi.nlm.nih.gov/Traces/wgs/wgsviewer.cgi?val=GBSL01000000&display=scaffolds)). Gene IDs and the protein sequences are listed in Table S1.  
12 Predicted protein sequences were aligned in Clustal W ([https://www.genome.jp/tools-](https://www.genome.jp/tools-bin/clustalw)  
13 [bin/clustalw](https://www.genome.jp/tools-bin/clustalw)). We excluded ambiguously aligned sequence to produce an alignment of  
14 297 amino acid characters in the conserved cytosolic domain. Bayesian analysis was  
15 performed using MrBayes 3.2.7 (Ronquist et al., 2012). Two runs with four chains of  
16 Markov chain Monte Carlo (MCMC) iterations were performed for 1,500,000 generations,  
17 keeping one tree every 100 generations. The first 25% of the generations were discarded  
18 as burn-in and the remaining trees were used to calculate a 50% majority-rule tree. The  
19 standard deviation for the two MCMC iteration runs was below 0.01, suggesting that it  
20 was sufficient for the convergens of the two runs. Convergence was assessed by visual  
21 inspection of the plot of the log likelihood scores of the two runs calculated by MrBayes  
22 (Gelman and Rubin, 1992). Character matrix used for the Bayesian phylogenetic analysis  
23 is provided in Data Sheet S1.

24



## 1 **Plant materials and growth conditions**

2 *Marchantia polymorpha* male Takaragaike-1 (Tak-1) accession was used as wild type in  
3 this study. *M. polymorpha* plants were grown on half-strength Gamborg B5 medium (pH  
4 5.5) solidified with 1.4% agar at 22 °C under continuous white light. *Nicotiana*  
5 *benthamiana* seeds were grown on BM2 soil (Berger) in a growth room at 23 °C under  
6 continuous LED light.

7

## 8 **Peptide treatment**

9 Synthetic peptides used in this study were analytically pure and dissolved in 0.1% TFA  
10 (trifluoroacetic acid) solution as stock solutions. For MpCLE2 peptide treatment,  
11 approximately 20 mature gemmae were floated on 2 mL liquid M51C medium containing  
12 2% sucrose supplemented with 3 μM MpCLE2 peptide (KEVHypNGHypNPLHN) or  
13 mock (TFA) solution, in 12-well plates as described previously (Hirakawa et al., 2020).  
14 For the TDIF treatment, gemmae were plated on half-strength B5 agar plates  
15 supplemented with 3 μM TDIF (HEVHypSGHypNPISN) or mock (TFA) solution as  
16 described previously (Hirakawa et al., 2019).

17

## 18 **Constructs**

19 Primers and plasmids are listed in Tables S2 and S3. All plant transformation vectors were  
20 generated using the Gateway cloning system (Thermo Fisher Scientific, MA, USA).  
21 Gateway destination vectors are described in Kinoshita et al., 2010, Ishizaki et al., 2015  
22 and Sugano et al., 2018, except for pMpGWB301-YUC2p, which was generated in this  
23 study. A 3032 bp DNA fragment of MpYUC2 promoter sequence flanking the translation  
24 initiation site was PCR amplified from pENTR-proMpYUC2 vector (Hirakawa et al.

1 2020) with a primer pair of MpYUC2prom3k\_F\_InFusion\_XbaI and  
2 MpYUC2prom\_R\_InFusion\_XbaI, and cloned into the *XbaI* digestion site of  
3 pMpGWB301 using In-Fusion HD Cloning Kit (Takara Bio, Shiga, Japan). For  
4 construction of *proMpYUC2:MpCLE1*, entry clones, pENTR-MpCLE1 and pENTR-  
5 MpCLE(1-417) (Hirakawa et al., 2019), were transferred to the pMpGWB301-YUC2p  
6 vector using Gateway LR Clonase II Enzyme mix (Thermo Fisher Scientific). For  
7 genome editing of *MpCIK*, a guide RNA was designed at the first exon/intron junction of  
8 Mp7g14210 using CRISPRdirect (<https://crispr.dbcls.jp/>) (Naito et al., 2015) and the  
9 plasmid for genome editing was constructed according to Sugano et al. 2018. For the  
10 expression of epitope-tagged receptors in *N. benthamiana*, coding sequences of *MpCIK*,  
11 *MpCLV1* and *MpTDR* were PCR amplified from *M. polymorpha* cDNA and cloned into  
12 pENTR/D-TOPO vector. Resultant entry clones (pENTR-MpCIK, pENTR-MpCLV1 and  
13 pENTR-MpTDR) were transferred to pXCSG-3FLAG or pXCSG-3HS vector using  
14 Gateway LR Clonase II Enzyme mix (Thermo Fisher Scientific).

15

### 16 **Production of transgenic *M. polymorpha***

17 Transgenic *M. polymorpha* plants are listed in Table S3. *Agrobacterium*-mediated  
18 transformation of *M. polymorpha* was performed using regenerating thalli according to  
19 Kubota et al. 2013. CRISPR/Cas9-based genome editing was performed according to  
20 Sugano et al. 2018 and mutations in the guide RNA target loci were examined by direct  
21 sequencing of PCR product amplified from genome DNA samples with primers listed in  
22 Table S2. Genome editing of *MpCLV1* was performed as described previously (Hirakawa  
23 et al., 2020). Nomenclature of genes and mutants are according to Bowman et al. 2016.

24

## 1 **Plant imaging and phenotypic measurement**

2 Overall morphology of plants was observed under a digital microscope (DMS1000, Leica  
3 Microsystems, Wetzlar, Germany) or under a digital camera (TG-6, Olympus, Tokyo,  
4 Japan). For the quantification of ground cover area in plant images, blue color was  
5 extracted and quantified using ImageJ (Schneider et al., 2012). For the measurement of  
6 apical notch width, plants grown on liquid medium were individually transferred onto  
7 agar medium and imaged under a digital microscope (DMS 1000, Leica Microsystems).  
8 To quantify the apical notch width, distance between the rims of apical notch was  
9 measured on the obtained images using ImageJ (Schneider et al., 2012).

10

## 11 **Promoter GUS assay**

12 Individual plants were stained separately in 30-50  $\mu$ L GUS staining solution (50 mM  
13 sodium phosphate buffer pH 7.2, 1 mM potassium-ferrocyanide, 1 mM potassium-  
14 ferricyanide, 10 mM EDTA, 0.01% Triton X-100 and 1 mM 5-bromo-4-chloro-3-indolyl-  
15  $\beta$ -D-glucuronic acid) at 37 °C in dark. GUS-stained samples were washed with water,  
16 cleared with ethanol and mounted with clearing solution for imaging under a light  
17 microscope (BX51, Olympus).

18

## 19 **Transient expression in *N. benthamiana***

20 *Agrobacterium tumefaciens* strains GV3101 MP90RK carrying expression constructs  
21 were grown in YEB medium with appropriate antibiotics, harvested by centrifugation at  
22 4,500 rpm for 10 min, and resuspended in infiltration buffer [10 mM MES (pH 5.7), 10  
23 mM MgCl<sub>2</sub>, 150  $\mu$ M acetosyringone]. The cultures were adjusted to an OD 600 of 1.0  
24 and incubated at room temperature for at least 3 h prior to infiltration. Equal volumes of

1 cultures of different constructs were mixed for co-infiltration, and then mixed with  
2 agrobacterial cultures (OD 600 of 1.0) carrying the p19 silencing suppressor in a 1:1 ratio  
3 (Voinnet et al., 1999). The resulting cultures were infiltrated into leaves of 3- to 4-week-  
4 old *N. benthamiana*. The leaf samples were harvested 3 d after infiltration for subsequent  
5 protein extraction (Betsuyaku et al., 2011).

6

### 7 **Protein extraction**

8 Total protein was extracted from the infiltrated *N. benthamiana* leaves with IP extraction  
9 buffer (1 : 1 w/v, 50 mM Tris-HCl pH 8.0, 150 mM NaCl, 10 % glycerol, 1 % Triton X-  
10 100, 1×Proteinase inhibitor cocktail SIGMA P9599 and 1 mM EDTA) and incubate the  
11 extract at 4 °C for 30 min. The lysates were centrifuged at 20,000×g for 20 min at 4 °C  
12 and the supernatants were then centrifuged again at 20,000×g for 5 min at 4 °C. The  
13 resultant supernatants were used as total protein lysates.

14

### 15 **Co-immunoprecipitation**

16 For immunoprecipitation, 1 ml of the lysates prepared with IP extraction buffer from 0.5  
17 g of leaves was incubated with anti-HA Affinity Matrix (Roche 11815016) for o/n in a  
18 rotary shaker at 4 °C. The beads were collected and washed three times with 1 ml of the  
19 extraction buffer. Immunoprecipitated proteins were eluted from the beads by boiling in  
20 SDS sample buffer at 95 °C and analyzed by Western blot using the corresponding  
21 antibodies. We used the following antibodies; Anti-HA-Peroxidase High Affinity (3F10)  
22 (Roche 12013819001) and Monoclonal ANTI-FLAG M2-Peroxidase (HRP) (SIGMA  
23 A8592).

24

## 1 **Data Availability Statement**

2 The original contributions presented in this study are included in the  
3 article/Supplementary Material.

4

## 5 **Author Contributions**

6 YH conceived the study, designed the work with input from all authors, and prepared the  
7 manuscript draft. GT, SB, NO and YH performed the experiments and analyzed the data.

8 All authors contributed to the article and approved the submitted version.

9

## 10 **Funding**

11 This work was supported by grants from Japan Science and Technology Agency ERATO  
12 (JPMJER1502 to S.B.) and JSPS KAKENHI (JP19K06727 to Y.H.).

13

## 14 **Conflict of Interest**

15 The authors declare that the research was conducted in the absence of any commercial or  
16 financial relationships that could be construed as a potential conflict of interest.

17

## 18 **Acknowledgments**

19 We thank colleagues in the peptide/protein center of WPI-ITbM for peptide synthesis,  
20 Eriko Betsuyaku and Ikuko Nakanomyo for technical assistance.

21

## 22 **References**

23 Aki, S.S., Mikami, T., Naramoto, S., Nishihama, R., Ishizaki, K., Kojima, M., et al. (2019).  
24 Cytokinin Signaling Is Essential for Organ Formation in *Marchantia polymorpha*. *Plant*

- 1 *Cell Physiol.* **60**:1842-1854.
- 2 Anne, P., Amiguet-Vercher, A., Brandt, B., Kalmbach, L., Geldner, N., Hothorn, M., et al.
- 3 (2018) CLERK is a novel receptor kinase required for sensing of root-active CLE peptides
- 4 in Arabidopsis. *Development* **145**:dev162354.
- 5 Araya, T., Miyamoto, M., Wibowo, J., Suzuki, A., Kojima, S., Tsuchiya, Y.N., et al. (2014).
- 6 CLE-CLAVATA1 peptide-receptor signaling module regulates the expansion of plant root
- 7 systems in a nitrogen-dependent manner. *Proc. Natl. Acad. Sci. U.S.A.* **111**:2029-2034.
- 8 Betsuyaku, S., Takahashi, F., Kinoshita, A., Miwa, H., Shinozaki, K., Fukuda, H., et al.
- 9 (2011). Mitogen-activated protein kinase regulated by the CLAVATA receptors
- 10 contributes to shoot apical meristem homeostasis. *Plant Cell Physiol.* **52**:14-29.
- 11 Bowman, J.L., Araki, T., Arteaga-Vazquez, M.A., Berger, F., Dolan, L., Haseloff, J., et al.
- 12 (2016). The Naming of Names: Guidelines for Gene Nomenclature in Marchantia. *Plant*
- 13 *Cell Physiol.* **57**:257-261.
- 14 Bowman, J.L., Kohchi, T., Yamato, K.T., Jenkins, J., Shu, S., Ishizaki, K., et al. (2017).
- 15 Insights into Land Plant Evolution Garnered from the Marchantia polymorpha
- 16 Genome. *Cell* **171**:287-304.
- 17 Cock, J.M., and McCormick, S. (2001). A large family of genes that share homology with
- 18 CLAVATA3. *Plant Physiol.* **126**:939-942.
- 19 Crook, A.D., Willoughby, A.C., Hazak, O., Okuda, S., VanDerMolen, K.R., Soyars, C.L.,
- 20 Cattaneo, P., Clark, N.M., Sozzani, R., Hothorn, M., Hardtke, C.S. and Nimchuk, Z.L.
- 21 (2020). BAM1/2 receptor kinase signaling drives CLE peptide-mediated formative cell
- 22 divisions in Arabidopsis roots. *Proc. Natl. Acad. Sci. U.S.A.* **117**:32750-32756.
- 23 Cui, Y., Hu, C., Zhu, Y., Cheng, K., Li, X., Wei, Z., et al. (2018). CIK Receptor Kinases
- 24 Determine Cell Fate Specification during Early Anther Development in

- 1 Arabidopsis. *Plant Cell* **30**:2383-2401.
- 2 Czyzewicz, N., Shi, C.L., Vu, L.D., Van De Cotte, B., Hodgman, C., Butenko, M.A., et  
3 al. (2015). Modulation of Arabidopsis and monocot root architecture by  
4 CLAVATA3/EMBRYO SURROUNDING REGION 26 peptide. *J. Exp. Bot.* **66**:5229-  
5 5243.
- 6 DeYoung, B.J., Bickle, K.L., Schrage, K.J., Muskett, P., Patel, K., and Clark, S.E. (2006).  
7 The CLAVATA1-related BAM1, BAM2 and BAM3 receptor kinase-like proteins are  
8 required for meristem function in Arabidopsis. *Plant J.* **45**:1-16.
- 9 Depuydt, S., Rodriguez-Villalon, A., Santuari, L., Wyser-Rmili, C., Ragni, L., and  
10 Hardtke, C.S. (2013). Suppression of Arabidopsis protophloem differentiation and root  
11 meristem growth by CLE45 requires the receptor-like kinase BAM3. *Proc. Natl. Acad.*  
12 *Sci. U.S.A.* **110**:7074-7079.
- 13 Doblas, V.G., Smakowska-Luzan, E., Fujita, S., Alassimone, J., Barberon, M., Madalinski,  
14 M., et al. (2017). Root diffusion barrier control by a vasculature-derived peptide binding  
15 to the SGN3 receptor. *Science* **355**:280-284.
- 16 Doll, N.M., Royek, S., Fujita, S., Okuda, S., Chamot, S., Stintzi, A., et al. (2020). A two-  
17 way molecular dialogue between embryo and endosperm is required for seed  
18 development. *Science* **367**:431-435.
- 19 Eklund, D.M., Ishizaki, K., Flores-Sandoval, E., Kikuchi, S., Takebayashi, Y., Tsukamoto,  
20 S., et al. (2015). Auxin Produced by the Indole-3-Pyruvic Acid Pathway Regulates  
21 Development and Gemmae Dormancy in the Liverwort *Marchantia polymorpha*. *Plant*  
22 *Cell* **27**:1650-1669.
- 23 Endo, S., Shinohara, H., Matsubayashi, Y., and Fukuda, H. (2013). A novel pollen-pistil  
24 interaction conferring high-temperature tolerance during reproduction via CLE45



- 1 signaling. *Curr. Biol.* **23**:1670-1676.
- 2 Etchells, J.P., and Turner, S.R. (2010). The PXY-CLE41 receptor ligand pair defines a  
3 multifunctional pathway that controls the rate and orientation of vascular cell  
4 division. *Development* **137**:767-774.
- 5 Ferreira-Guerra, M., Marquès-Bueno, M., Mora-García, S., and Caño-Delgado, A.I.  
6 (2020). Delving into the evolutionary origin of steroid sensing in plants. *Curr. Opin. Plant*  
7 *Biol.* **57**:87-95.
- 8 Fisher, K., and Turner, S. (2007). PXY, a receptor-like kinase essential for maintaining  
9 polarity during plant vascular-tissue development. *Curr. Biol.* **17**:1061-1066.
- 10 Fletcher, J.C., Brand, U., Running, M.P., Simon, R., and Meyerowitz, E.M. (1999).  
11 Signaling of cell fate decisions by CLAVATA3 in Arabidopsis shoot  
12 meristems. *Science* **283**:1911-1914.
- 13 Fletcher, J.C. (2020). Recent Advances in Arabidopsis CLE Peptide Signaling. *Trends.*  
14 *Plant. Sci.* **25**:1005-1016.
- 15 Flores-Sandoval, E., Eklund, D.M., and Bowman, J.L. (2015). A Simple Auxin  
16 Transcriptional Response System Regulates Multiple Morphogenetic Processes in the  
17 Liverwort *Marchantia polymorpha*. *PLoS Genet.* **11**:e1005207.
- 18 Fontes, E.P., Santos, A.A., Luz, D.F., Waclawovsky, A.J., and Chory, J. (2004). The  
19 geminivirus nuclear shuttle protein is a virulence factor that suppresses transmembrane  
20 receptor kinase activity. *Genes. Dev.* **18**:2545-2556.
- 21 Furumizu, C., and Sawa, S. (2021). Insight into early diversification of leucine-rich repeat  
22 receptor-like kinases provided by the sequenced moss and hornwort genomes. *Plant Mol.*  
23 *Biol.* Epub ahead of print.
- 24 Gelman, A., and Rubin, D.B. (1992) Inference from Iterative Simulation Using Multiple

- 1 Sequences. *Statist. Sci.* **7**:457-472.
- 2 Gou, X., and Li, J. (2020). Paired Receptor and Coreceptor Kinases Perceive Extracellular  
3 Signals to Control Plant Development. *Plant Physiol.* **182**:1667-1681.
- 4 Gutiérrez-Alanís, D., Yong-Villalobos, L., Jiménez-Sandoval, P., Alatorre-Cobos, F.,  
5 Oropeza-Aburto, A., Mora-Macías, J., et al. (2017). Phosphate Starvation-Dependent Iron  
6 Mobilization Induces CLE14 Expression to Trigger Root Meristem Differentiation  
7 through CLV2/PEPR2 Signaling. *Dev. Cell* **41**:555-570.
- 8 Hirakawa, Y., Fujimoto, T., Ishida, S., Uchida, N., Sawa, S., Kiyosue, T., et al. (2020).  
9 Induction of Multichotomous Branching by CLAVATA Peptide in *Marchantia*  
10 *polymorpha*. *Curr. Biol.* **30**:3833-3840.
- 11 Hirakawa, Y., Kondo, Y., and Fukuda, H. (2010). TDIF peptide signaling regulates  
12 vascular stem cell proliferation via the WOX4 homeobox gene in *Arabidopsis*. *Plant*  
13 *Cell* **22**:2618-2629.
- 14 Hirakawa, Y., and Sawa, S. (2019). Diverse function of plant peptide hormones in local  
15 signaling and development. *Curr. Opin. Plant. Biol.* **51**:81-87.
- 16 Hirakawa, Y., Shinohara, H., Kondo, Y., Inoue, A., Nakanomyo, I., Ogawa, M., et al.  
17 (2008). Non-cell-autonomous control of vascular stem cell fate by a CLE peptide/receptor  
18 system. *Proc. Natl. Acad. Sci. U.S.A.* **105**:15208-15213.
- 19 Hirakawa, Y., Shinohara, H., Welke, K., Irle, S., Matsubayashi, Y., Torii, K.U., et al.  
20 (2017). Cryptic bioactivity capacitated by synthetic hybrid plant peptides. *Nat.*  
21 *Commun.* **8**:14318-.
- 22 Hirakawa, Y., Uchida, N., Yamaguchi, Y.L., Tabata, R., Ishida, S., Ishizaki, K., et al.  
23 (2019). Control of proliferation in the haploid meristem by CLE peptide signaling in  
24 *Marchantia polymorpha*. *PLoS Genet.* **15**:e1007997.

- 1 Hohmann, U., Lau, K., and Hothorn, M. (2017). The Structural Basis of Ligand  
2 Perception and Signal Activation by Receptor Kinases. *Annu. Rev. Plant Biol.* **68**:109-  
3 137.
- 4 Hohmann, U., Santiago, J., Nicolet, J., Olsson, V., Spiga, F.M., Hothorn, L.A., et al.  
5 (2018). Mechanistic basis for the activation of plant membrane receptor kinases by  
6 SERK-family coreceptors. *Proc. Natl. Acad. Sci. U.S.A.* **115**:3488-3493.
- 7 Hu, C., Zhu, Y., Cui, Y., Cheng, K., Liang, W., Wei, Z., et al. (2018). A group of receptor  
8 kinases are essential for CLAVATA signalling to maintain stem cell homeostasis. *Nat.*  
9 *Plants* **4**:205-211.
- 10 Y., et al. (2015). Development of Gateway Binary Vector Series with Four Different  
11 Selection Markers for the Liverwort *Marchantia polymorpha*. *PLoS One* **10**:e0138876.
- 12 Ito, Y., Nakanomyo, I., Motose, H., Iwamoto, K., Sawa, S., Dohmae, N., et al. (2006).  
13 Dodeca-CLE peptides as suppressors of plant stem cell differentiation. *Science* **313**:842-  
14 845.
- 15 Jaillais, Y., Belkhadir, Y., Balsemão-Pires, E., Dangl, J.L., and Chory, J. (2011).  
16 Extracellular leucine-rich repeats as a platform for receptor/coreceptor complex  
17 formation. *Proc. Natl. Acad. Sci. U.S.A.* **108**:8503-8507.
- 18 Jun, J., Fiume, E., Roeder, A.H., Meng, L., Sharma, V.K., Osmont, K.S., et al. (2010).  
19 Comprehensive analysis of CLE polypeptide signaling gene expression and  
20 overexpression activity in *Arabidopsis*. *Plant Physiol.* **154**:1721-1736.
- 21 Kato, H., Yasui, Y., and Ishizaki, K. (2020). Gemma cup and gemma development in  
22 *Marchantia polymorpha*. *New Phytol.* **228**:459-465.
- 23 Kinoshita, A., Betsuyaku, S., Osakabe, Y., Mizuno, S., Nagawa, S., Stahl, Y., et al. (2010).  
24 RPK2 is an essential receptor-like kinase that transmits the CLV3 signal in

- 1 *Arabidopsis*. *Development* **137**:3911-3920.
- 2 Kondo, Y., Hirakawa, Y., Kieber, J.J., and Fukuda, H. (2011). CLE peptides can  
3 negatively regulate protoxylem vessel formation via cytokinin signaling. *Plant Cell*  
4 *Physiol.* **52**:37-48.
- 5 Kubota, A., Ishizaki, K., Hosaka, M., and Kohchi, T. (2013). Efficient *Agrobacterium*-  
6 mediated transformation of the liverwort *Marchantia polymorpha* using regenerating  
7 thalli. *Biosci. Biotechnol. Biochem.* **77**:167-172.
- 8 Li, D., Flores-Sandoval, E., Ahtesham, U., Coleman, A., Clay, J.M., Bowman, J.L. et al.  
9 (2020). Ethylene-independent functions of the ethylene precursor ACC in *Marchantia*  
10 *polymorpha*. *Nat. Plants* **6**:1335-1344.
- 11 Ma, D., Endo, S., Betsuyaku, S., Shimotohno, A., and Fukuda, H. (2020). CLE2 regulates  
12 light-dependent carbohydrate metabolism in *Arabidopsis* shoots. *Plant Mol.*  
13 *Biol.* **104**:561-574.
- 14 Matsubayashi, Y. (2014). Posttranslationally modified small-peptide signals in  
15 plants. *Annu. Rev. Plant Biol.* **65**:385-413.
- 16 Montgomery, S.A., Tanizawa, Y., Galik, B., Wang, N., Ito, T., Mochizuki, T., et al. (2020).  
17 Chromatin Organization in Early Land Plants Reveals an Ancestral Association between  
18 H3K27me3, Transposons, and Constitutive Heterochromatin. *Curr. Biol.* **30**:573-588.
- 19 Morita, J., Kato, K., Nakane, T., Kondo, Y., Fukuda, H., Nishimasu, H., et al. (2016).  
20 Crystal structure of the plant receptor-like kinase TDR in complex with the TDIF  
21 peptide. *Nat. Commun.* **7**:12383-.
- 22 Morris, J.L., Puttick, M.N., Clark, J.W., Edwards, D., Kenrick, P., Pressel, S., et al. (2018).  
23 The timescale of early land plant evolution. *Proc. Natl. Acad. Sci. U.S.A.* **115**:E2274-  
24 E2283.

- 1 Mortier, V., Den Herder, G., Whitford, R., Van de Velde, W., Rombauts, S., D'Haeseleer,  
2 et al. (2010). CLE peptides control *Medicago truncatula* nodulation locally and  
3 systemically. *Plant Physiol.* **153**:222-237.
- 4 Murphy, E., Smith, S., and De Smet, I. (2012). Small signaling peptides in Arabidopsis  
5 development: how cells communicate over a short distance. *Plant Cell* **24**:3198-3217.
- 6 Nakayama, T., Shinohara, H., Tanaka, M., Baba, K., Ogawa-Ohnishi, M., and  
7 Matsubayashi, Y. (2017). A peptide hormone required for Casparian strip diffusion barrier  
8 formation in Arabidopsis roots. *Science* **355**:284-286.
- 9 Naito, Y., Hino, K., Bono, H., and Ui-Tei, K. (2015). CRISPRdirect: software for  
10 designing CRISPR/Cas guide RNA with reduced off-target sites. *Bioinformatics* **31**:1120-  
11 1123.
- 12 Oelkers, K., Goffard, N., Weiller, G.F., Gresshoff, P.M., Mathesius, U., and Frickey, T.  
13 (2008). Bioinformatic analysis of the CLE signaling peptide family. *BMC Plant Biol.* **8**:1.
- 14 Ogawa, M., Shinohara, H., Sakagami, Y., and Matsubayashi, Y. (2008). Arabidopsis  
15 CLV3 peptide directly binds CLV1 ectodomain. *Science* **319**:294.
- 16 Ohyama, K., Shinohara, H., Ogawa-Ohnishi, M., and Matsubayashi, Y. (2009). A  
17 glycopeptide regulating stem cell fate in Arabidopsis thaliana. *Nat. Chem. Biol.* **5**:578-  
18 580.
- 19 Okamoto, S., Ohnishi, E., Sato, S., Takahashi, H., Nakazono, M., Tabata, S., et al. (2009).  
20 Nod factor/nitrate-induced CLE genes that drive HAR1-mediated systemic regulation of  
21 nodulation. *Plant Cell Physiol.* **50**:67-77.
- 22 Okuda, S., Fujita, S., Moretti, A., Hohmann, U., Doblas, V.G., Ma, Y., et al. (2020).  
23 Molecular mechanism for the recognition of sequence-divergent CIF peptides by the plant  
24 receptor kinases GSO1/SGN3 and GSO2. *Proc. Natl. Acad. Sci. U.S.A.* **117**:2693-2703.

- 1 Ou, Y., Lu, X., Zi, Q., Xun, Q., Zhang, J., Wu, Y., et al. (2016). RGF1 INSENSITIVE 1  
2 to 5, a group of LRR receptor-like kinases, are essential for the perception of root  
3 meristem growth factor 1 in *Arabidopsis thaliana*. *Cell Res.* **26**:686-698.
- 4 Perraki, A., DeFalco, T.A., Derbyshire, P., Avila, J., Séré, D., Sklenar, J., et al. (2018).  
5 Phosphocode-dependent functional dichotomy of a common co-receptor in plant  
6 signalling. *Nature* **561**:248-252.
- 7 Puttick, M.N., Morris, J.L., Williams, T.A., Cox, C.J., Edwards, D., Kenrick, P., et al.  
8 (2018). The Interrelationships of Land Plants and the Nature of the Ancestral  
9 Embryophyte. *Curr. Biol.* **28**:733-745.
- 10 Qian, P., Song, W., Yokoo, T., Minobe, A., Wang, G., Ishida, T., et al. (2018). The  
11 CLE9/10 secretory peptide regulates stomatal and vascular development through distinct  
12 receptors. *Nat. Plants* **4**:1071-1081.
- 13 Rico-Reséndiz, F., Cervantes-Pérez, S.A., Espinal-Centeno, A., Dipp-Álvarez, M.,  
14 Oropeza-Aburto, A., Hurtado-Bautista, E., et al. (2020) Transcriptional and Morpho-  
15 Physiological Responses of *Marchantia polymorpha* upon Phosphate Starvation. *Int. J.*  
16 *Mol. Sci.* **21**:8354.
- 17 Rodríguez-Villalon, A., Gujas, B., Kang, Y.H., Breda, A.S., Cattaneo, P., Depuydt, S., et  
18 al. (2014). Molecular genetic framework for protophloem formation. *Proc. Natl. Acad.*  
19 *Sci. U.S.A.* **111**:11551-11556.
- 20 Rodríguez-Leal, D., Lemmon, Z.H., Man, J., Bartlett, M.E., and Lippman, Z.B. (2017).  
21 Engineering Quantitative Trait Variation for Crop Improvement by Genome  
22 Editing. *Cell* **171**:470-480.
- 23 Ronquist, F., Teslenko, M., van der Mark, P., Ayres, D.L., Darling, A., Höhna, S., et al.  
24 (2012). MrBayes 3.2: efficient Bayesian phylogenetic inference and model choice across

- 1 a large model space. *Syst. Biol.* **61**:539-542.
- 2 Santiago, J., Brandt, B., Wildhagen, M., Hohmann, U., Hothorn, L.A., Butenko, M.A., et  
3 al. (2016) Mechanistic insight into a peptide hormone signaling complex mediating floral  
4 organ abscission. *Elife* **5**:e15075.
- 5 Santiago, J., Henzler, C., and Hothorn, M. (2013). Molecular mechanism for plant steroid  
6 receptor activation by somatic embryogenesis co-receptor kinases. *Science* **341**:889-892.
- 7 Sasaki, G., Katoh, K., Hirose, N., Suga, H., Kuma, K., Miyata, T., et al. (2007). Multiple  
8 receptor-like kinase cDNAs from liverwort *Marchantia polymorpha* and two  
9 charophycean green algae, *Closterium ehrenbergii* and *Nitella axillaris*: Extensive gene  
10 duplications and gene shufflings in the early evolution of streptophytes. *Gene* **401**:135-  
11 144.
- 12 Schneider, C.A., Rasband, W.S., and Eliceiri, K.W. (2012). NIH Image to ImageJ: 25  
13 years of image analysis. *Nat. Methods* **9**:671-675.
- 14 Shimizu, N., Ishida, T., Yamada, M., Shigenobu, S., Tabata, R., Kinoshita, A., et al. (2015).  
15 BAM 1 and RECEPTOR-LIKE PROTEIN KINASE 2 constitute a signaling pathway and  
16 modulate CLE peptide-triggered growth inhibition in *Arabidopsis* root. *New*  
17 *Phytol.* **208**:1104-1113.
- 18 Shinohara, H., and Matsubayashi, Y. (2015). Reevaluation of the CLV3-receptor  
19 interaction in the shoot apical meristem: dissection of the CLV3 signaling pathway from  
20 a direct ligand-binding point of view. *Plant J.* **82**:328-336.
- 21 Shinohara, H., Mori, A., Yasue, N., Sumida, K., and Matsubayashi, Y. (2016).  
22 Identification of three LRR-RKs involved in perception of root meristem growth factor  
23 in *Arabidopsis*. *Proc. Natl. Acad. Sci. U.S.A.* **113**:3897-3902.
- 24 Shiu, S.H., and Bleecker, A.B. (2001). Receptor-like kinases from *Arabidopsis* form a



- 1 monophyletic gene family related to animal receptor kinases. *Proc. Natl. Acad. Sci.*  
2 *U.S.A.* **98**:10763-10768.
- 3 Song, W., Liu, L., Wang, J., Wu, Z., Zhang, H., Tang, J., et al. (2016). Signature motif-  
4 guided identification of receptors for peptide hormones essential for root meristem  
5 growth. *Cell Res.* **26**:674-685.
- 6 Stahl, Y., Wink, R.H., Ingram, G.C., and Simon, R. (2009). A signaling module  
7 controlling the stem cell niche in Arabidopsis root meristems. *Curr. Biol.* **19**:909-914.
- 8 Sugano, S.S., Nishihama, R., Shirakawa, M., Takagi, J., Matsuda, Y., Ishida, S., et al.  
9 (2018). Efficient CRISPR/Cas9-based genome editing and its application to conditional  
10 genetic analysis in *Marchantia polymorpha*. *PLoS One* **13**:e0205117.
- 11 Sun, Y., Han, Z., Tang, J., Hu, Z., Chai, C., Zhou, B., et al. (2013). Structure reveals that  
12 BAK1 as a co-receptor recognizes the BRI1-bound brassinolide. *Cell Res* **23**:1326-1329.
- 13 Suzaki, T., Yoshida, A., and Hirano, H.Y. (2008). Functional diversification of  
14 CLAVATA3-related CLE proteins in meristem maintenance in rice. *Plant Cell* **20**:2049-  
15 2058.
- 16 Suzuki, H., Harrison, C.J., Shimamura, M., Kohchi, T., and Nishihama, R. (2020).  
17 Positional cues regulate dorsal organ formation in the liverwort *Marchantia*  
18 *polymorpha*. *J. Plant Res.* **133**:311-321.
- 19 Tabata, R., Sumida, K., Yoshii, T., Ohyama, K., Shinohara, H., and Matsubayashi, Y.  
20 (2014). Perception of root-derived peptides by shoot LRR-RKs mediates systemic N-  
21 demand signaling. *Science* **346**:343-346.
- 22 Takahashi, F., Suzuki, T., Osakabe, Y., Betsuyaku, S., Kondo, Y., Dohmae, N., et al.  
23 (2018). A small peptide modulates stomatal control via abscisic acid in long-distance  
24 signalling. *Nature* **556**:235-238.

- 1 Tamaki, T., Betsuyaku, S., Fujiwara, M., Fukao, Y., Fukuda, H., and Sawa, S. (2013).  
2 SUPPRESSOR OF LLP1 1-mediated C-terminal processing is critical for CLE19 peptide  
3 activity. *Plant J.* **76**:970-981.
- 4 Voinnet, O., Pinto, Y.M., and Baulcombe, D.C. (1999) Suppression of gene silencing: a  
5 general strategy used by diverse DNA and RNA viruses of plants. *Proc. Natl. Acad. Sci.*  
6 *U.S.A.* **96**:14147-14152. Erratum in: *Proc. Natl. Acad. Sci. U.S.A.* (2015)  
7 **112**:E4812. Wang, J., Li, H., Han, Z., Zhang, H., Wang, T., Lin, G., et al. (2015). Allosteric  
8 receptor activation by the plant peptide hormone phytosulfokine. *Nature* **525**:265-268.
- 9 Whitewoods, C.D., Cammarata, J., Nemeček, V., Sang, S., Crook, A.D., Aoyama, T.,  
10 et al. (2018). CLAVATA Was a Genetic Novelty for the Morphological Innovation of 3D  
11 Growth in Land Plants. *Curr. Biol.* **28**:2365-2376.
- 12 Yamaguchi, Y., Pearce, G., and Ryan, C.A. (2006). The cell surface leucine-rich repeat  
13 receptor for AtPep1, an endogenous peptide elicitor in Arabidopsis, is functional in  
14 transgenic tobacco cells. *Proc. Natl. Acad. Sci. U.S.A.* **103**:10104-10109.
- 15 Yasui, Y., Tsukamoto, S., Sugaya, T., Nishihama, R., Wang, Q., Kato, H., et al. (2019).  
16 GEMMA CUP-ASSOCIATED MYB1, an Ortholog of Axillary Meristem Regulators, Is  
17 Essential in Vegetative Reproduction in *Marchantia polymorpha*. *Curr. Biol.* **29**:3987-  
18 3995.
- 19 Zhang, H., Lin, X., Han, Z., Qu, L.J., and Chai, J. (2016a). Crystal structure of PXY-TDIF  
20 complex reveals a conserved recognition mechanism among CLE peptide-receptor  
21 pairs. *Cell Res.* **26**:543-555.
- 22 Zhang, H., Lin, X., Han, Z., Wang, J., Qu, L.J., and Chai, J. (2016b). SERK Family  
23 Receptor-like Kinases Function as Co-receptors with PXY for Plant Vascular  
24 Development. *Mol. Plant* **9**:1406-1414.
